# Supplementary material for: Effects of an Electric Current on the Superplastic Deformation Behavior of 3Y-TZP in an Oxygen-Lean Atmosphere
Source: MDPI journal article supplement (doi:10.3390/ma16206785), 2023-10-20
Supplement: s1 [file s1]

# Effects of an Electric Current on the Superplastic Deformation Behavior of 3Y-TZP in an Oxygen-Lean Atmosphere

Kang Wang <sup>1</sup>, Yufei Zu <sup>2</sup>, Guoqing Chen <sup>1,\*</sup>, Xuesong Fu <sup>1</sup> and Wenlong Zhou <sup>1</sup>

<sup>1</sup> Key Laboratory of Solidification Control and Digital Preparation Technology (Liaoning Province), School of Materials Science and Technology, Dalian University of Technology, Dalian 116085, China; wangkang245@mail.dlut.edu.cn (K.W.); xsfu@dlut.edu.cn (X.F.); wlzhou@dlut.edu.cn (W.Z.)

<sup>2</sup> Key Laboratory of Advanced Technology for Aerospace Vehicles (Liaoning Province), School of Aeronautics and Astronautics, Dalian University of Technology, Dalian 116085, China; yfzu@dlut.edu.cn

\* Correspondence: gqchen@dlut.edu.cn; Tel.: +86-0411-84707970

## Supplementary material

A schematic diagram of the apparatus used for the experiment is shown in Figure S1.

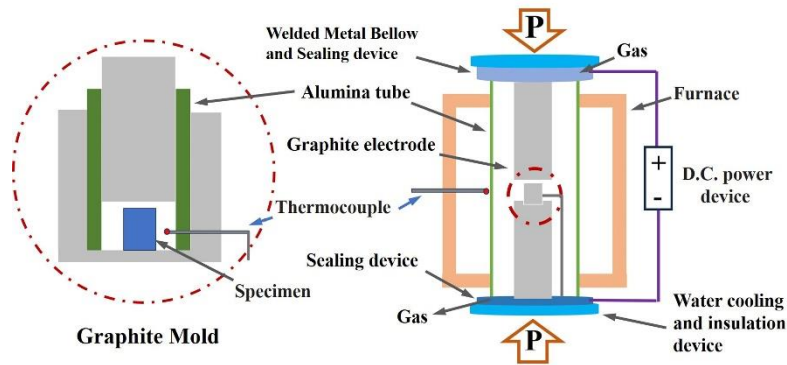

**Figure S1.** A schematic diagram of the apparatus used for the experiment.

Figure S2 shows the microstructure of the deformed 3Y-TZP with 5 A near the anode side ( $x = 0.7$ ) at 1400°C, in which the cathode and anode electrodes were located at  $x = 0$  and  $x = 1$ , respectively. The corresponding average grain size was 241 nm.

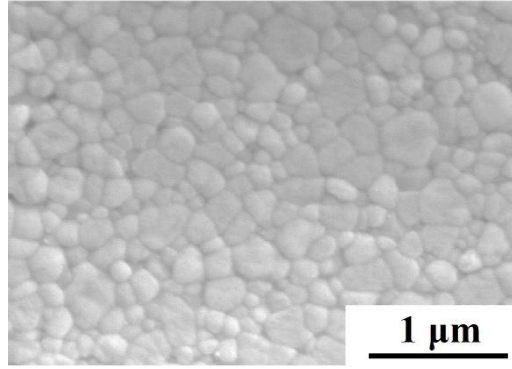

**Figure S2.** The microstructure of the deformed 3Y-TZP with 5 A near the anode side ( $x = 0.7$ ) at 1400°C, in which the cathode and anode electrodes were located at  $x = 0$  and  $x = 1$ , respectively.

The grain sizes of 3Y-TZP before and after deformation at a true strain of 0.5 and at different deformation temperatures are shown in Table S1.

**Table S1.** The grain sizes of 3Y-TZP before and after deformation at a true strain of 0.5 and at different deformation temperatures.

| Temperature<br>(°C) | Initial grain size<br>(nm) | Grain size before<br>deformation<br>(nm) | Grain size after<br>deformation with<br>0 A (nm) | Grain size after<br>deformation with<br>5 A (nm) |
|---------------------|----------------------------|------------------------------------------|--------------------------------------------------|--------------------------------------------------|
| 1200 °C             | 125                        | 125                                      | 159                                              | 209                                              |
| 1300 °C             | 125                        | 136                                      | 191                                              | 265                                              |
| 1400 °C             | 125                        | 148                                      | 218                                              | 359                                              |

The SEM observation points in the deformed specimen had a normalized distance from the cathode electrode of 0.3, in which the cathode and anode electrodes were located at  $x = 0$  and  $x = 1$ , respectively.
